# Supplementary material
Source: publisher site journal article supplement (https://www.dovepress.com/article/245080)
Supplement: Supplementary file 1 [file get_supplementary_file.php]

## Supplementary Methods

### Cytokine Array

The relative levels of multiple cytokines in supernatant were measured using Human Cytokine Array Panel A (ARY005) following the manufacturer's instructions (R&D Systems, UK) and Molecular Imager ChemiDoc XRS+ System (Bio-Rad, UK). The results are presented as mean pixel density.

**Supplementary Figure** Preadipocyte-specific effect of  $1\alpha,25(\text{OH})_2\text{D}_3$  on cytokines secreted in macrophage-induced preadipocytes. Preadipocytes were pre-incubated with  $1\alpha,25(\text{OH})_2\text{D}_3$  (10 nM) in preadipocyte growth medium for 48 h, and then incubated with 25% MacCM or 25% MacCM along with  $1\alpha,25(\text{OH})_2\text{D}_3$  (10 nM) in preadipocyte growth medium for a further 24 h. Supernatants were collected after the incubation, and then pooled (n=6). **(A)** Cytokines were measured using cytokine array. **(B)** The results are presented as mean pixel density in bar graph form.

A

MacCM(25%)

$1\alpha,25(\text{OH})_2\text{D}_3(10\text{nM})+\text{MacCM}(25\%)$

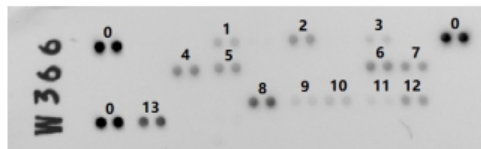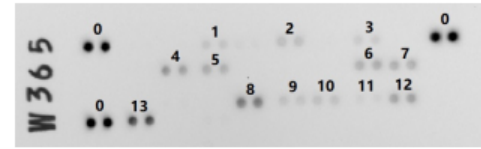

B

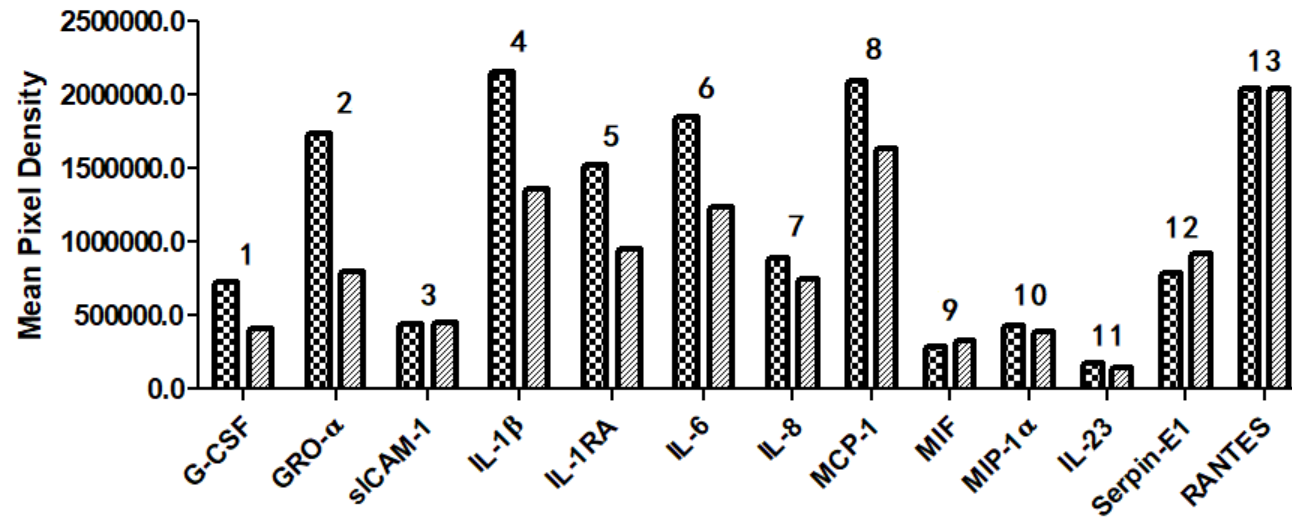

0: Reference Spot
